# Supplementary material for: Toxicity and Starvation Induce Major Trophic Isotope Variation in Daphnia Individuals: A Diet Switch Experiment Using Eight Phytoplankton Species of Differing Nutritional Quality
Source: MDPI journal article supplement (doi:10.3390/biology11121816), 2022-12-14
Supplement: s1 [file s1]

## Supplementary Material

**Table S1:** Stable isotopic signature of *D. magna* of the different dietary treatments at the last sampling time [h]. Shown are the stable isotopes values, the trophic discrimination factors ( $\Delta_{T4}$ ) at the end of the experiment (96 h) as well as the difference between the end and the initial values ( $\delta_{T4-T0}$ ). For *M. aeruginosa* we used the end values at 72 h (after diet switch) due to high mortality rate of *D. magna* fed on the algae.

| Time (h) | diet                                 | $\delta^{13}\text{C}$ | $\delta^{15}\text{N}$ | $\Delta^{13}\text{C}_{T4}$ | $\Delta^{15}\text{N}_{T4}$ | $\delta^{13}\text{C}_{T4-T0}$ | $\delta^{15}\text{N}_{T4-T0}$ |
|----------|--------------------------------------|-----------------------|-----------------------|----------------------------|----------------------------|-------------------------------|-------------------------------|
| 0        | <i>A. obliquus</i><br>(Cyano-Medium) | $-26.64 \pm 0.19$     | $8.54 \pm 0.28$       |                            |                            |                               |                               |
| 72       | <i>M. aeruginosa</i>                 | $-25.06 \pm 0.18$     | $9.71 \pm 0.72$       | $7.33 \pm 0.29$            | $5.74 \pm 0.72$            | $1.57 \pm 0.25$               | $1.17 \pm 0.59$               |
| 96       | <i>P. agardhii</i>                   | $-25.90 \pm 0.19$     | $10.47 \pm 0.4$       | $6.70 \pm 0.08$            | $7.15 \pm 0.38$            | $6.58 \pm 0.68$               | $0.68 \pm 2.42$               |
| 96       | <i>P. rubescens</i>                  | $-26.91 \pm 0.15$     | $12.69 \pm 1.12$      | $7.41 \pm 0.21$            | $7.64 \pm 1.12$            | $-0.27 \pm 0.26$              | $5.15 \pm 0.85$               |
| 96       | <i>T. variabilis</i>                 | $-28.78 \pm 0.25$     | $9.16 \pm 0.50$       | $2.33 \pm 0.26$            | $5.58 \pm 0.50$            | $-2.14 \pm 0.13$              | $0.61 \pm 0.64$               |
| 96       | <i>S. elongatus</i><br>(green)       | $-28.14 \pm 0.32$     | $9.25 \pm 0.57$       | $2.53 \pm 0.24$            | $2.17 \pm 0.44$            | $5.70 \pm 0.68$               | $-1.96 \pm 0.9$               |
| 96       | <i>S. elongatus</i><br>(red)         | $-28.86 \pm 0.16$     | $9.92 \pm 0.98$       | $1.65 \pm 0.03$            | $6.08 \pm 0.98$            | $-2.22 \pm 0.20$              | $1.37 \pm 1.25$               |
| 96       | <i>A. obliquus</i>                   | $-31.60 \pm 0.23$     | $8.21 \pm 0.10$       | $1.46 \pm 0.16$            | $5.56 \pm 0.10$            | $-4.95 \pm 0.31$              | $-0.34 \pm 0.20$              |

|    |                      |                   |                 |                 |                 |                 |                 |                  |                  |                  |                  |
|----|----------------------|-------------------|-----------------|-----------------|-----------------|-----------------|-----------------|------------------|------------------|------------------|------------------|
| 96 | <i>C. klinobasis</i> | $-31.45 \pm 0.21$ | $7.71 \pm 0.40$ | $0.59 \pm 0.12$ | $0.84 \pm 0.49$ | $5.26 \pm 0.40$ | $5.47 \pm 0.26$ | $-4.81 \pm 0.07$ | $-4.92 \pm 0.26$ | $-0.83 \pm 0.56$ | $-0.17 \pm 0.74$ |
| 96 | <i>C. vulgaris</i>   | $-31.64 \pm 0.14$ | $9.19 \pm 0.15$ | $0.46 \pm 0.2$  |                 | $5.57 \pm 0.15$ |                 | $-5.00 \pm 0.38$ |                  | $0.65 \pm 0.33$  |                  |
| 96 | starvation           | $-19.66 \pm 0.46$ | $8.06 \pm 0.46$ |                 |                 |                 |                 | $1.17 \pm 0.59$  |                  | $-0.32 \pm 0.51$ |                  |
